# Supplementary material
Source: publisher figshare collection journal article supplement (https://acs.figshare.com/ndownloader/files/22391220)
Supplement: Supplementary file 1 [file 22391220]

**Supplementary Information for:**

# Flexible MoS<sub>2</sub>-Polyimide Electrode for Electrochemical Biosensors and their Applications for the highly sensitive Quantification of Endocrine Hormones: PTH, T3, and T4

*Hyeong-U Kim,<sup>†, ‡, #</sup> Hye Youn Kim,<sup>§, #</sup> Hyunho Seok,<sup>†</sup> Vinit Kanade,<sup>†</sup> Hocheon Yoo,<sup>||</sup> Kyu-Young Park,<sup>‡</sup> Jae-Hyun Lee,<sup>⊥</sup> Min-Ho Lee,<sup>\*, §</sup> and Taesung Kim,<sup>\*, †, †</sup>*

<sup>†</sup> SKKU Advanced Institute of Nanotechnology (SAINT), Sungkyunkwan University, Suwon 16419, Republic of Korea

<sup>‡</sup> Department of Materials Science and Engineering, Northwestern University, Evanston 60208, United States

<sup>§</sup> School of Integrative Engineering, Chung-Ang University, Seoul 06973, Republic of Korea

<sup>||</sup> Department of Electronic Engineering, Gachon University, Seongnam 13120, Republic of Korea

<sup>⊥</sup> Department of Energy Systems Research and Department of Materials Science and Engineering, Ajou University, Suwon 16499, Republic of Korea

<sup>\*</sup> School of Mechanical Engineering, Sungkyunkwan University, Suwon 16419, Republic of Korea

\*Corresponding authors: [tkim@skku.edu](mailto:tkim@skku.edu), [mhlee7@cau.ac.kr](mailto:mhlee7@cau.ac.kr)

**Preparation of Au-PI electrode for MoS<sub>2</sub>.** Polyimide (PI) can be used as a substrate for MoS<sub>2</sub> since its melting point is around 200 °C. The thickness of polyimide film is 175 µm and tensile strength is larger than 130 MPa. (Suzhou Kying Industrial Materials Co., Ltd, China) A4 size of PI was patterned using a shadow mask with an e-beam evaporator. The shadow mask shows a working electrode (circle) and contact electrode (Rectangular) shape as shown in **Figure S2a**. A double line of the electrode was designed, and 12 electrodes can deposit at the same time in a 4-inch wafer as shown in **Figure S2b**. It is loaded in an e-beam evaporator for deposition of the 1nm Mo metal layer. It is called the Au-PI electrode for synthesizing of MoS<sub>2</sub>.

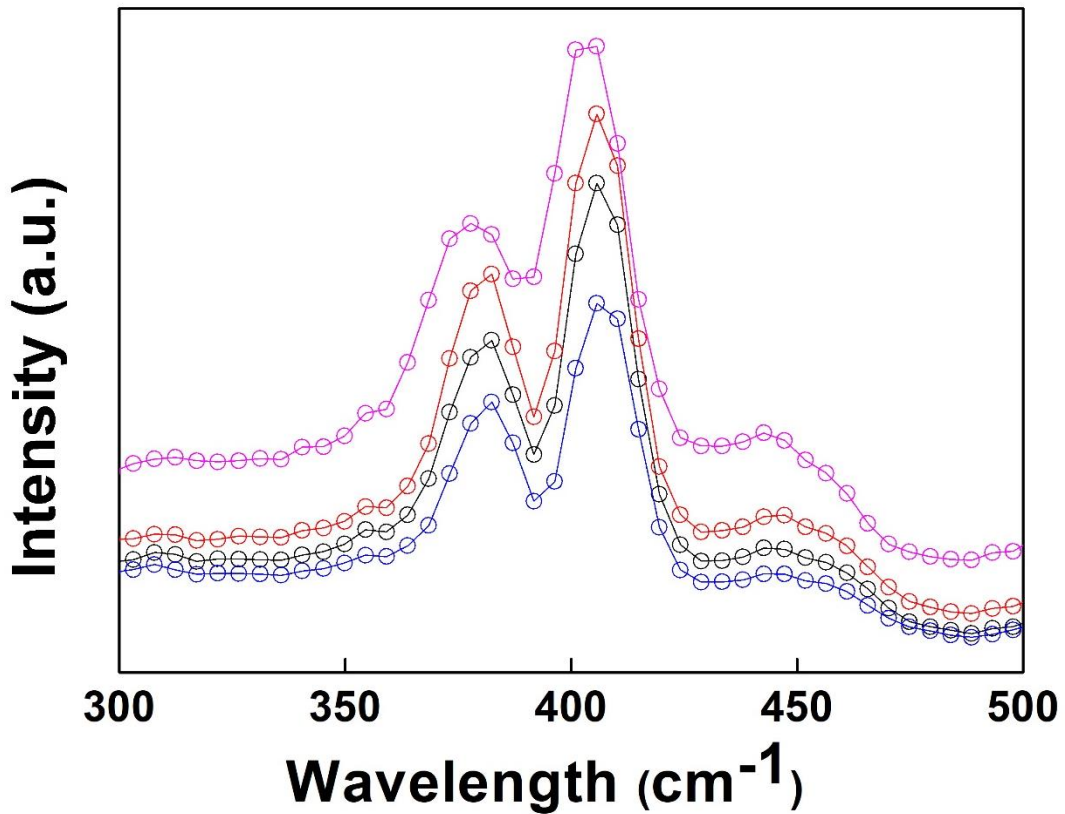

**Figure S1.** Uniformity test for Raman spectrum with four different MoS<sub>2</sub>-Au-PI electrodes

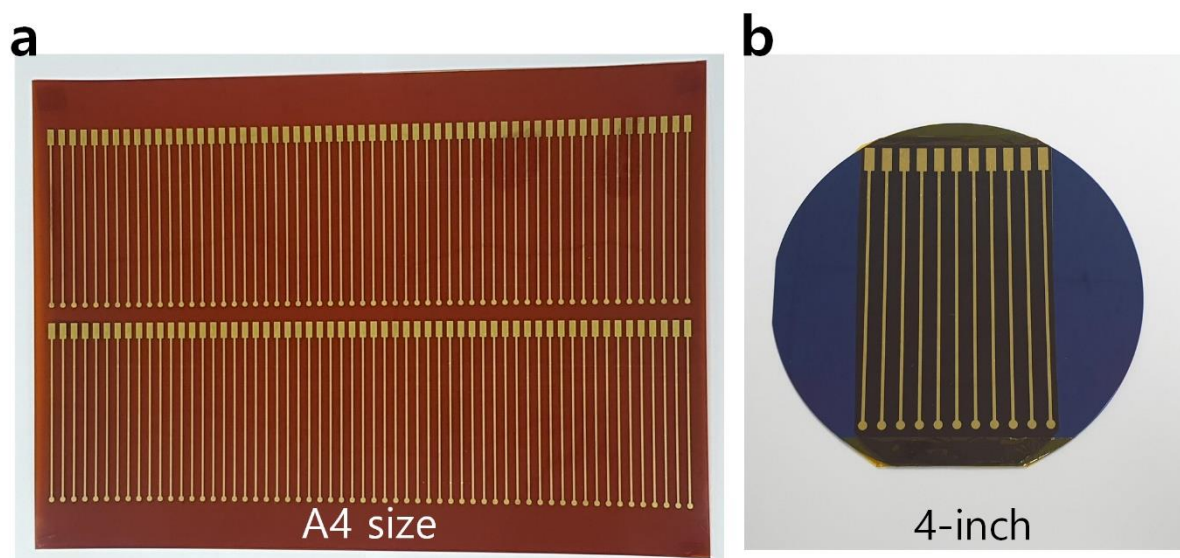

**Figure S2.** Photograph of Au patterned PI as a substrate for the MoS<sub>2</sub>-Au-PI electrode. a) Au patterned on the PI substrate. b) 12 of Au-PI electrode before Mo deposition using e-beam evaporator.

**Correlation Analysis.** The ALP-(PTH, T3, T4)-MoS<sub>2</sub>-Au-PI flexible was analyzed in terms of its linear range, reproducibility, and repeatability. The concentrations of endocrine hormones (PTH, T3, T4) from 30 subjects' serum were evaluated using E 170 as reference standards. The results measured by the standard equipment for each clinical sample were determined by standard Pearson correlation coefficients using electrochemical with ALP-(PTH, T3, T4)-MoS<sub>2</sub>-Au-PI flexible complex. As a measurement of the average correlation between samples, the number of average correlations for all standard results were calculated. The slope of the fitted line, Roche E 170, used to compare expression levels of Real Samples to the rest of the data set, was calculated using linear regression minimizing the sum of the squared errors.

**Table S1.** Analytical evaluation of clinical samples using electrochemical with ALP-(PTH, T3, T4)-MoS<sub>2</sub>-Au-PI flexible complex and their accuracy of correlation with the standard results using E 170 ( $n = 30$ ). a) PTH; b) T3; c) T4. The Pearson correlation factor between the measured and standard results for PTH, T3, and T4 were 0.98, 0.80, and 0.82, respectively.

**a**

| No. | Mean of PTH concentration of clinical samples | Mean of PTH concentration of E 170 | Accuracy (%) |
|-----|-----------------------------------------------|------------------------------------|--------------|
| 1   | 1.11                                          | 1.2                                | 92.5         |
| 2   | 4.61                                          | 7.7                                | 59.87        |
| 3   | 16.14                                         | 8.96                               | 19.87        |
| 4   | 8.28                                          | 9.16                               | 90.39        |
| 5   | 9.94                                          | 10.73                              | 92.64        |
| 6   | 25.3                                          | 15.95                              | 41.38        |
| 7   | 25.78                                         | 20.2                               | 72.38        |
| 8   | 5.5                                           | 20.83                              | 26.40        |
| 9   | 21.45                                         | 21.7                               | 98.85        |
| 10  | 26.63                                         | 22.92                              | 83.81        |
| 11  | 10                                            | 24.79                              | 40.34        |
| 12  | 20.36                                         | 30.6                               | 66.54        |
| 13  | 31.93                                         | 32.07                              | 99.56        |
| 14  | 33.01                                         | 32.92                              | 99.73        |
| 15  | 46.14                                         | 35.08                              | 68.47        |
| 16  | 28.19                                         | 38.83                              | 72.6         |
| 17  | 34.34                                         | 42.01                              | 81.74        |
| 18  | 48                                            | 42.41                              | 86.82        |
| 19  | 40.72                                         | 50.55                              | 80.55        |
| 20  | 62.5                                          | 62.42                              | 99.87        |
| 21  | 30.84                                         | 78.38                              | 39.35        |
| 22  | 85.63                                         | 95.42                              | 89.74        |
| 23  | 83.13                                         | 110.9                              | 74.96        |
| 24  | 160                                           | 144                                | 88.88        |

|    |        |       |       |
|----|--------|-------|-------|
| 25 | 213.33 | 172.5 | 76.33 |
| 26 | 183.33 | 189.4 | 96.8  |
| 27 | 236.67 | 280.8 | 84.28 |
| 28 | 333.33 | 351.9 | 94.72 |
| 29 | 353.33 | 384.9 | 91.8  |
| 30 | 390    | 399.7 | 97.57 |

**b**

| No. | Mean of T3 concentration of clinical samples | Mean of T3 concentration of E 170 | Accuracy (%) |
|-----|----------------------------------------------|-----------------------------------|--------------|
| 1   | 0.86                                         | 0.71                              | 78.87        |
| 2   | 0.87                                         | 0.72                              | 79.17        |
| 3   | 0.67                                         | 0.79                              | 84.81        |
| 4   | 1.2                                          | 0.8                               | 50           |
| 5   | 0.5                                          | 0.9                               | 55.56        |
| 6   | 1.17                                         | 0.93                              | 74.19        |
| 7   | 1.65                                         | 0.95                              | 26.32        |
| 8   | 1.5                                          | 1                                 | 50           |
| 9   | 0.69                                         | 1.02                              | 67.65        |
| 10  | 1.07                                         | 1.02                              | 95.1         |
| 11  | 1.62                                         | 1.04                              | 44.23        |
| 12  | 0.8                                          | 1.05                              | 76.19        |
| 13  | 1.32                                         | 1.09                              | 78.9         |
| 14  | 1.15                                         | 1.09                              | 94.5         |
| 15  | 1.68                                         | 1.1                               | 47.27        |
| 16  | 1.15                                         | 1.1                               | 95.45        |
| 17  | 1.56                                         | 1.18                              | 67.8         |
| 18  | 1.83                                         | 1.21                              | 48.76        |
| 19  | 0.48                                         | 1.32                              | 36.36        |
| 20  | 1.25                                         | 1.52                              | 82.24        |
| 21  | 1.48                                         | 1.61                              | 91.93        |
| 22  | 1.76                                         | 1.78                              | 98.88        |
| 23  | 1.46                                         | 1.84                              | 79.35        |
| 24  | 2.41                                         | 2.11                              | 85.78        |

|    |      |      |       |
|----|------|------|-------|
| 25 | 1.58 | 2.44 | 64.75 |
| 26 | 2.76 | 2.49 | 89.16 |
| 27 | 1.73 | 2.54 | 68.11 |
| 28 | 3.65 | 3.83 | 95.30 |
| 29 | 4.36 | 3.91 | 88.49 |
| 30 | 3.82 | 4.64 | 82.33 |

**c**

| No. | Mean of T4 concentration of clinical samples | Mean of T4 concentration of E 170 | Accuracy (%) |
|-----|----------------------------------------------|-----------------------------------|--------------|
| 1   | 4.53                                         | 3.1                               | 53.87        |
| 2   | 3.15                                         | 4.6                               | 68.48        |
| 3   | 4.62                                         | 5.1                               | 90.59        |
| 4   | 3.92                                         | 5.3                               | 73.96        |
| 5   | 5.1                                          | 5.3                               | 96.23        |
| 6   | 7.3                                          | 6                                 | 78.33        |
| 7   | 7.13                                         | 6.4                               | 88.59        |
| 8   | 6.44                                         | 6.7                               | 96.12        |
| 9   | 6.17                                         | 6.8                               | 90.74        |
| 10  | 4.76                                         | 6.8                               | 70           |
| 11  | 7.46                                         | 7                                 | 93.43        |
| 12  | 6.79                                         | 7.1                               | 95.63        |
| 13  | 7.03                                         | 7.2                               | 97.64        |
| 14  | 4.96                                         | 7.3                               | 67.95        |
| 15  | 6.75                                         | 7.5                               | 90           |
| 16  | 8.85                                         | 7.8                               | 86.54        |
| 17  | 9.55                                         | 8                                 | 80.63        |
| 18  | 7.87                                         | 8.8                               | 89.43        |
| 19  | 6.32                                         | 8.8                               | 71.82        |
| 20  | 8.09                                         | 8.9                               | 90.9         |
| 21  | 9.02                                         | 9.4                               | 95.96        |
| 22  | 8.97                                         | 10                                | 89.7         |
| 23  | 9.59                                         | 10.2                              | 94.02        |
| 24  | 10.47                                        | 10.4                              | 99.33        |

|    |       |      |       |
|----|-------|------|-------|
| 25 | 8.09  | 10.5 | 77.05 |
| 26 | 9.86  | 11.4 | 86.49 |
| 27 | 13.31 | 11.5 | 84.26 |
| 28 | 14.5  | 12.3 | 82.11 |
| 29 | 13.6  | 12.5 | 91.2  |
| 30 | 14.3  | 14.4 | 99.31 |

---
